# Supplementary material for: JAM3 methylation status as a biomarker for diagnosis of preneoplastic and neoplastic lesions of the cervix
Source: PubMed Central journal article supplement (PMC4792563; doi:10.18632/oncotarget.6250), 2015-10-27
Supplement: oncotarget-06-44373-s001.pdf [file oncotarget-06-44373-s001.pdf]

## JAM3 methylation status as a biomarker for diagnosis of preneoplastic and neoplastic lesions of the cervix

### Supplementary Materials

**Supplementary Table 1: Diagnostic performance of different methods for distinguishing different diagnostic groups in P1**

|          | CIN3+/CIN1- |         |         |         | CIN3+/CIN2- |         |         |         | CIN2+/CIN1- |         |         |         |
|----------|-------------|---------|---------|---------|-------------|---------|---------|---------|-------------|---------|---------|---------|
|          | SEN (%)     | SPE (%) | PPV (%) | NPV (%) | SEN (%)     | SPE (%) | PPV (%) | NPV (%) | SEN (%)     | SPE (%) | PPV (%) | NPV (%) |
| HPV      | 98.15       | 16.33   | 39.26   | 94.12   | 98.15       | 10.56   | 26.90   | 94.44   | 98.29       | 16.33   | 58.38   | 88.89   |
| Cytology | 91.67       | 27.37   | 38.94   | 86.67   | 91.67       | 23.22   | 26.99   | 90.00   | 86.79       | 26.80   | 56.44   | 65.00   |
| JAM3-M4  | 87.95       | 85.58   | 82.02   | 90.48   | 87.95       | 73.63   | 60.33   | 93.06   | 68.83       | 85.58   | 86.88   | 66.43   |

Abbreviations: Sen: sensitivities, Spe: specificities, PPV: positive predictive value, NPV: negative predictive value

**Supplementary Table 2: Triage performance of methylation marker for patients with abnormal cytology smear in P1**

|                      | CIN3+/CIN1- |         |         |         | CIN3+/CIN2- |         |         |         | CIN2+/CIN1- |         |         |         |
|----------------------|-------------|---------|---------|---------|-------------|---------|---------|---------|-------------|---------|---------|---------|
|                      | SEN (%)     | SPE (%) | PPV (%) | NPV (%) | SEN (%)     | SPE (%) | PPV (%) | NPV (%) | SEN (%)     | SPE (%) | PPV (%) | NPV (%) |
| Cytology (+)→HPV     | 97.06       | 1.89    | 38.82   | 50.00   | 97.06       | 12.73   | 25.58   | 93.33   | 98.72       | 1.89    | 59.69   | 50.00   |
| Cytology (+)→JAM3-M4 | 88.64       | 84.28   | 78.00   | 92.19   | 88.64       | 70.34   | 52.70   | 94.32   | 69.56       | 84.28   | 85.33   | 67.82   |

**Supplementary Table 3: Complementary performance of methylation marker for hrHPV testing and cytology testing in P1**

|                    | CIN3+/CIN1- |         |         |         | CIN3+/CIN2- |         |         |         | CIN2+/CIN1- |         |         |         |
|--------------------|-------------|---------|---------|---------|-------------|---------|---------|---------|-------------|---------|---------|---------|
|                    | SEN (%)     | SPE (%) | PPV (%) | NPV (%) | SEN (%)     | SPE (%) | PPV (%) | NPV (%) | SEN (%)     | SPE (%) | PPV (%) | NPV (%) |
| HPV + Cytology     | 89.19       | 41.57   | 38.82   | 90.24   | 89.19       | 33.33   | 25.58   | 92.31   | 83.70       | 41.57   | 59.69   | 71.15   |
| HPV + JAM3-M4      | 85.18       | 89.69   | 82.14   | 91.58   | 85.18       | 76.25   | 54.76   | 93.85   | 64.10       | 89.69   | 88.24   | 67.44   |
| Cytology + JAM3-M4 | 81.25       | 88.54   | 78.00   | 90.42   | 81.25       | 77.27   | 52.70   | 92.97   | 60.38       | 88.54   | 85.33   | 66.93   |

**Supplementary Table 4: Complementary performance of methylation marker for cytology testing in P2**

|                    | CIN3+/CIN1- |         |         |         | CIN3+/CIN2- |         |         |         | CIN2+/CIN1- |         |         |         |
|--------------------|-------------|---------|---------|---------|-------------|---------|---------|---------|-------------|---------|---------|---------|
|                    | SEN (%)     | SPE (%) | PPV (%) | NPV (%) | SEN (%)     | SPE (%) | PPV (%) | NPV (%) | SEN (%)     | SPE (%) | PPV (%) | NPV (%) |
| Cytology + HPV     | 75.86       | 47.42   | 30.14   | 86.79   | 75.86       | 41.35   | 22.00   | 88.71   | 75.38       | 47.42   | 49.00   | 74.19   |
| Cytology + JAM3-M4 | 67.50       | 92.04   | 75.00   | 88.89   | 67.50       | 82.91   | 50.00   | 90.97   | 52.94       | 92.04   | 83.33   | 72.22   |
